# Supplementary material for: The TMPRSS2:ERG Rearrangement, ERG Expression, and Prostate Cancer Outcomes: A Cohort Study and Meta-analysis
Source: Oxford University Press journal article supplement (doi:10.1158/1055-9965.epi-12-0042), 2012-09-01
Supplement: 10559965epi120042-sup-tab3.xls [file 10559965epi120042-sup-tab3.xls]

## Sheet: Excluded Studies
Supplemental Table 3. List of studies reviewed for but excluded from the meta-analysis
Reference	Reason for Exclusion
Attard G, Clark J, Ambroisine L, Mills IG, Fisher G, Flohr P, et al. Heterogeneity and clinical significance of ETV1 translocations in human prostate cancer. Br J Cancer 2008;99:314-20.	No data regarding endpoints of interest by TMPRSS2:ERG status
Barwick BG, Abramovitz M, Kodani M, Moreno CS, Nam R, Tang W, et al. Prostate cancer genes associated with TMPRSS2-ERG gene fusion and prognostic of biochemical recurrence in multiple cohorts. Br J Cancer 2010;102:570-6.	Possible Duplicate Data: Nam 2007 (manuscript reference #12) included in meta-analysis instead
Bi X, He H, Ye Y, Dai Q, Han Z, Liang Y, et al. Association of TMPRSS2 and KLK11 gene expression levels with clinical progression of human prostate cancer. Med Oncol 2010;27:145-51.	No data regarding endpoints of interest by TMPRSS2:ERG status
Bismar TA, Dolph M, Teng LH, Liu S, Donnelly B. ERG protein expression reflects hormonal treatment response and is associated with Gleason score and prostate cancer specific mortality. Eur J Cancer 2012;48:538-46.	Sample Size Discrepancies
Bismar TA, Yoshimoto M, Duan Q, Liu S, Sircar K, Squire JA. Interactions and relationships of PTEN, ERG, SPINK1 and AR in castration-resistant prostate cancer. Histopathology 2012;60:645-52.	No data regarding endpoints of interest
Bismar TA, Yoshimoto M, Vollmer RT, Duan Q, Firszt M, Corcos J, et al. PTEN genomic deletion is an early event associated with ERG gene rearrangements in prostate cancer. BJU Int 2011;107:477-85.	No data regarding endpoints of interest by TMPRSS2:ERG status
Brase JC, Johannes M, Mannsperger H, Falth M, Metzger J, Kacprzyk LA, et al. TMPRSS2-ERG -specific transcriptional modulation is associated with prostate cancer biomarkers and TGF-beta signaling. BMC Cancer 2011;11:507.	Possible Duplicate Data: Minner, Enodien 2011 (manuscript reference #26) included in meta-analysis instead
Braun M, Goltz D, Shaikhibrahim Z, Vogel W, Bohm D, Scheble V, et al. ERG protein expression and genomic rearrangement status in primary and metastatic prostate cancer-a comparative study of two monoclonal antibodies. Prostate Cancer Prostatic Dis 2012.	No data regarding endpoints of interest
Cai J, Kandagatla P, Singareddy R, Kropinski A, Sheng S, Cher ML, et al. Androgens Induce Functional CXCR4 through ERG Factor Expression in TMPRSS2-ERG Fusion-Positive Prostate Cancer Cells. Transl Oncol 2010;3:195-203.	No data regarding endpoints of interest
Cao DL, Ye DW, Zhang HL, Zhu Y, Wang YX, Yao XD. A multiplex model of combining gene-based, protein-based, and metabolite-based with positive and negative markers in urine for the early diagnosis of prostate cancer. Prostate 2011;71:700-10.	No data regarding endpoints of interest by TMPRSS2:ERG status
Chang B, Li F, Song LJ. Updates on molecular markers of prostatic cancer. Chinese Journal of Pathology 2008;37:339-41.	Unavailable in English
Chaux A, Albadine R, Toubaji A, Hicks J, Meeker A, Platz E. A, et al. Immunohistochemistry for ERG expression as a surrogate for TMPRSS2-ERG fusion detection in prostatic adenocarcinomas. Am J Surg Pathol 2011;35:1014-20.	No data regarding endpoints of interest
Chen Y, Sawyers CL. Coordinate transcriptional regulation by ERG and androgen receptor in fusion-positive prostate cancers. Cancer Cell 2010;17:415-6.	No data regarding TMPRSS2:ERG or endpoints of interest
Cheng L, Teng XD, Zhou L. Molecular pathology of multifocal prostate cancer and its clinical application. Chinese Journal of Pathology 2011;40:436-9.	Unavailable in English
Cheville JC, Karnes RJ, Therneau TM, Kosari F, Munz JM, Tillmans L, et al. Gene panel model predictive of outcome in men at high-risk of systemic progression and death from prostate cancer after radical retropubic prostatectomy. J Clin Oncol 2008;26:3930-6.	Case-control studies were excluded because cumulative incidence ratios could not be calculated for the recurrence/mortality analyses
Clark JP, Munson KW, Gu JW, Lamparska-Kupsik K, Chan KG, Yoshida JS, et al. Performance of a single assay for both type III and type VI TMPRSS2:ERG fusions in noninvasive prediction of prostate biopsy outcome. Clin Chem 2008;54:2007-17.	Continuous Assay
Cross SS, Rehman I, Hamdy FC, Sethuraman C, Goepel JR, Maltby E. TMPRSS2 fusions in prostate cancer. Diagn Histopathol 2008;14:134-8.	No data regarding TMPRSS2:ERG or endpoints of interest
Dai MJ, Chen LL, Zheng YB, Chen W, Tao ZH, Weng ZL, et al. Frequency and transcript variant analysis of gene fusions between TMPRSS2 and ETS transcription factor genes in prostate cancer. National Medical Journal of China 2008;88:669-73.	Unavailable in English
Danila DC, Anand A, Sung CC, Heller G, Leversha MA, Cao L, et al. TMPRSS2-ERG status in circulating tumor cells as a predictive biomarker of sensitivity in castration-resistant prostate cancer patients treated with abiraterone acetate. Eur Urol 2011;60:897-904.	Examining Specialized Subgroups (circulating tumor cells)
Dhani NC, Emmenegger U, Adams L, Jongstra J, Tannock IF, Sridhar SS, et al. Phase II study of cytarabine in men with docetaxel-refractory, castration-resistant prostate cancer with evaluation of TMPRSS2-ERG and SPINK1 as serum biomarkers. BJU Int 2012.	Unclear Tissue Collection Procedure
Ding YX, Juan Q. Research progress and clinical implication prospect of TMPRSS2-ETS fusion gene in prostate cancer. Journal of Shanghai Jiaotong University (Medical Science) 2011;31:853-7.	Unavailable in English
Dobi A, Furusato B, Shaheduzzaman S, Chen Y, Vahey M, Nydam T, et al. ERG expression levels in prostate tumors reflect functional status of the androgen receptor (AR) as a consequence of fusion of ERG with AR regulated gene promoters. Open Cancer Journal 2010;3:101-8.	No data regarding endpoints of interest by TMPRSS2:ERG status
Efstathiou E, Titus M, Tsavachidou D, Tzelepi V, Wen S, Hoang A, et al. Effects of abiraterone acetate on androgen signaling in castrate-resistant prostate cancer in bone. J Clin Oncol 2012;30:637-43.	No data regarding endpoints of interest by TMPRSS2:ERG status
Falzarano SM, Zhou M, Carver P, Tsuzuki T, Simmerman K, He H, et al. ERG gene rearrangement status in prostate cancer detected by immunohistochemistry. Virchows Arch 2011;459:441-7.	No data regarding endpoints of interest by TMPRSS2:ERG status
Fine SW, Gopalan A, Leversha MA, Al-Ahmadie HA, Tickoo SK, Zhou Q, et al. TMPRSS2-ERG gene fusion is associated with low Gleason scores and not with high-grade morphological features. Mod Pathol 2010;23:1325-33.	Possible Duplicate Data: Gopalan 2009 (manuscript reference #15) included in meta-analysis instead
Foster CS, Dodson AR, Ambroisine L, Fisher G, Moller H, Clark J, et al. Hsp-27 expression at diagnosis predicts poor clinical outcome in prostate cancer independent of ETS-gene rearrangement. Br J Cancer 2009;101:1137-44.	No data regarding endpoints of interest by TMPRSS2:ERG status
Getzenberg RH. Novel approaches for the molecular classification of prostate cancer. Asian Journal of Andrology 2010;12:620-2.	No data regarding endpoints of interest by TMPRSS2:ERG status
Giri VN, Ruth K, Hughes L, Uzzo RG, Chen DY, Boorjian SA, et al. Racial differences in prediction of time to prostate cancer diagnosis in a prospective screening cohort of high-risk men: effect of TMPRSS2 Met160Val. BJU Int 2011;107:466-70.	No data regarding endpoints of interest by TMPRSS2:ERG status
Gordanpour A, Stanimirovic A, Nam RK, Moreno CS, Sherman C, Sugar L, et al. miR-221 Is down-regulated in TMPRSS2:ERG fusion-positive prostate cancer. Anticancer Res 2011;31:403-10.	Possible Duplicate Data: Nam 2007 (manuscript reference #12) included in meta-analysis instead
Guo CC, Dancer JY, Wang Y, Aparicio A, Navone NM, Troncoso P, et al. TMPRSS2-ERG gene fusion in small cell carcinoma of the prostate. Hum Pathol 2011;42:11-7.	Examining Specialized Subgroups (small cell carcinoma)
Guo CC, Wang Y, Xiao L, Troncoso P, Czerniak BA. The relationship of TMPRSS2-ERG gene fusion between primary and metastatic prostate cancers. Hum Pathol 2011.	Possible Duplicate Data: Guo 2009 (manuscript reference #59) included in meta-analysis instead
Han B, Mehra R, Dhanasekaran SM, Yu J, Menon A, Lonigro RJ, et al. A fluorescence in situ hybridization screen for E26 transformation-specific aberrations: identification of DDX5-ETV4 fusion protein in prostate cancer. Cancer Res 2008;68:7629-37.	No data regarding endpoints of interest by TMPRSS2:ERG status
Han B, Mehra R, Lonigro RJ, Wang L, Suleman K, Menon A, et al. Fluorescence in situ hybridization study shows association of PTEN deletion with ERG rearrangement during prostate cancer progression. Mod Pathol 2009;22:1083-93.	No data regarding endpoints of interest by TMPRSS2:ERG status
Han B, Suleman K, Wang L, Siddiqui J, Sercia L, Magi-Galluzzi C, et al. ETS gene aberrations in atypical cribriform lesions of the prostate: implications for the distinction between intraductal carcinoma of the prostate and cribriform high-grade prostatic intraepithelial neoplasia. Am J Surg Pathol 2010;34:478-85.	Examining Specialized Subgroups (atypical cribriform lesions)
He H, Magi-Galluzzi C, Li J, Carver P, Falzarano S, Smith K, et al. The diagnostic utility of novel immunohistochemical marker ERG in the workup of prostate biopsies with "atypical glands suspicious for cancer". Am J Surg Pathol 2011;35:608-14.	No data regarding endpoints of interest
Inoue T. Signal transduction pathways involved in progression to androgen-independent prostate cancer. Nihon Rinsho 2011;69 Suppl 5:121-5.	Unavailable in English
Karnes RJ, Cheville JC, Ida CM, Sebo TJ, Nair AA, Tang H, et al. The ability of biomarkers to predict systemic progression in men with high-risk prostate cancer treated surgically is dependent on ERG status. Cancer Res 2010;70: 8994-9002.	Case-control studies were excluded because cumulative incidence ratios could not be calculated for the recurrence/mortality analyses
Kron K, Liu L, Trudel D, Pethe V, Trachtenberg J, Fleshner NE, et al. Correlation of ERG expression and DNA methylation biomarkers with adverse clinicopathological features of prostate cancer. Clin Cancer Res 2012.	Sample size for analysis of Gleason score by TMPRSS2:ERG status unavailable
Lapointe J, Li C, Giacomini CP, Salari K, Huang S, Wang P, et al. Genomic profiling reveals alternative genetic pathways of prostate tumorigenesis. Cancer Res 2007;67:8504-10.	No data regarding endpoints of interest
Larsen CJ. New markers for a more specific approach to prostate cancer? Bulletin du Cancer 2008;95:392.	Unavailable in English
Liu S, Yoshimoto M, Trpkov K, Duan Q, Firszt M, Corcos J, et al. Detection of ERG gene rearrangements and PTEN deletions in unsuspected prostate cancer of the transition zone. Cancer Biol Ther 2011;11:562-6.	No data regarding endpoints of interest by TMPRSS2:ERG status
Lotan TL, Gupta NS, Wang W, Toubaji A, Haffner MC, Chaux A, et al. ERG gene rearrangements are common in prostatic small cell carcinomas. Mod Pathol 2011;24:820-8.	No data regarding endpoints of interest by TMPRSS2:ERG status
Lotan TL, Toubaji A, Albadine R, Latour M, Herawi M, Meeker AK, et al. TMPRSS2-ERG gene fusions are infrequent in prostatic ductal adenocarcinomas. Mod Pathol 2009;22:359-65.	Examining Specialized Subgroups (ductal adenocarcinomas)
Markert EK, Mizuno H, Vazquez A, Levine AJ. Molecular classification of prostate cancer using curated expression signatures. Proc Natl Acad Sci U S A 2011;108:21276-81.	Sample size for analysis of mortality by TMPRSS2:ERG status unavailable; data for Gleason score by TMPRSS2:ERG status unavailable in the categorization specified for the meta-analysis; standard deviations for age by TMPRSS2:ERG status unavailable
Mehra R, Tomlins SA, Yu J, Cao X, Wang L, Menon A, et al. Characterization of TMPRSS2-ETS gene aberrations in androgen-independent metastatic prostate cancer. Cancer Res 2008;68:3584-90.	No data regarding endpoints of interest
Miettinen M, Wang ZF, Paetau A, Tan SH, Dobi A, Srivastava S, et al. ERG transcription factor as an immunohistochemical marker for vascular endothelial tumors and prostatic carcinoma. Am J Surg Pathol 2011;35:432-41.	No data regarding endpoints of interest
Mucci LA, Pawitan Y, Demichelis F, Fall K, Stark JR, Adami HO, et al. Testing a multigene signature of prostate cancer death in the Swedish Watchful Waiting Cohort. Cancer Epidemiol Biomarkers Prev 2008;17:1682-8.	No data regarding endpoints of interest by TMPRSS2:ERG status
Nam RK, Sugar L, Wang Z, Yang W, Kitching R, Klotz LH, et al. Expression of TMPRSS2:ERG gene fusion in prostate cancer cells is an important prognostic factor for cancer progression. Cancer Biol Ther 2007;6:40-5.	Possible Duplicate Data: Nam 2007 (manuscript reference #12) included in meta-analysis instead
Nelson WG, Yegnasubramanian S. Somatic DNA methylation changes as molecular biomarkers for prostate cancer. Cancer Biomarkers 2008;4:184-6.	No data regarding TMPRSS2:ERG or endpoints of interest
Nguyen PN, Violette P, Chan S, Tanguay S, Kassouf W, Aprikian A, et al. A panel of TMPRSS2:ERG fusion transcript markers for urine-based prostate cancer detection with high specificity and sensitivity. Eur Urol 2011;59:407-14.	No data regarding endpoints of interest by TMPRSS2:ERG status
Panagopoulos I, Soller MJ, Isaksson M, Elfving P, Soller W, Lundgren R. Confirmation of the high frequency of the TMPRSS2/ERG fusion gene in prostate cancer. Genes Chromosomes and Cancer 2006;45:717-9.	No data regarding endpoints of interest
Perner S, Mosquera JM, Demichelis F, Hofer MD, Paris PL, Simko J, et al. TMPRSS2-ERG fusion prostate cancer: an early molecular event associated with invasion. Am J Surg Pathol 2007;31:882-8.	No data regarding endpoints of interest by TMPRSS2:ERG status
Perner S, Svensson MA, Hossain RR, Day JR, Groskopf J, Slaughter RC, et al. ERG rearrangement metastasis patterns in locally advanced prostate cancer. Urology 2010;75:762-7.	Possible Duplicate Data: Hofer, Kuefer, Maier, Rubin, Hoegel 2009 (manuscript reference #18) included in meta-analysis instead
Pflueger D, Terry S, Sboner A, Habegger L, Esgueva R, Lin PC, et al. Discovery of non-ETS gene fusions in human prostate cancer using next-generation RNA sequencing. Genome Res 2011;21:56-67.	No data regarding endpoints of interest by TMPRSS2:ERG status
Rajput AB, Miller MA, De Luca A, Boyd N, Leung S, Hurtado-Coll A, et al. Frequency of the TMPRSS2:ERG gene fusion is increased in moderate to poorly differentiated prostate cancers. J Clin Pathol 2007;60:1238-43.	Sample Size Discrepancies
Reid AH, Attard G, Ambroisine L, Fisher G, Kovacs G, Brewer D, et al. Molecular characterisation of ERG, ETV1 and PTEN gene loci identifies patients at low and high risk of death from prostate cancer. Br J Cancer 2010;102:678-84.	Possible Duplicate Data: Attard, Clark 2008 (manuscript reference #10) included in meta-analysis instead
Reid AH, Attard G, Brewer D, Miranda S, Riisnaes R, Clark J, et al. Novel, gross chromosomal alterations involving PTEN cooperate with allelic loss in prostate cancer. Mod Pathol 2012.	No data regarding endpoints of interest by TMPRSS2:ERG status
Ren S, Peng Z, Mao JH, Yu Y, Yin C, Gao X, et al. RNA-seq analysis of prostate cancer in the Chinese population identifies recurrent gene fusions, cancer-associated long noncoding RNAs and aberrant alternative splicings. Cell Res 2012.	No data regarding endpoints of interest by TMPRSS2:ERG status
Ribeiro FR, Paulo P, Costa VL, Barros-Silva JD, Ramalho-Carvalho J, Jeronimo C, et al. Cysteine-rich secretory protein-3 (CRISP3) is strongly up-regulated in prostate carcinomas with the TMPRSS2-ERG fusion gene. PLoS One 2011;6:e22317.	Possible Duplicate Data: Barros-Silva 2011 (manuscript reference #63) included in meta-analysis instead
Rice KR, Chen Y, Ali A, Whitman EJ, Blase A, Ibrahim M, et al. Evaluation of the ETS-related gene mRNA in urine for the detection of prostate cancer. Clin Cancer Res 2010;16:1572-6.	No data regarding endpoints of interest by TMPRSS2:ERG status
Rickman DS, Chen Y, Banerjee S, Pan Y, Yu J, Vuong T, et al. ERG cooperates with androgen receptor in regulating trefoil factor 3 in prostate cancer disease progression. Neoplasia 2010;12:1031-40.	No data regarding endpoints of interest
Rinnab L, Cronauer M, Spindler D, Hautmann RE, Kufer R. Research at the Ulm University in prostate cancer. Urologe A 2007;46:1071-7.	Unavailable in English
Risk MC, Knudsen BS, Coleman I, Dumpit RF, Kristal AR, LeMeur N, et al. Differential gene expression in benign prostate epithelium of men with and without prostate cancer: evidence for a prostate cancer field effect. Clin Cancer Res 2010;16:5414-23.	No data regarding endpoints of interest
Rostad K, Mannelqvist M, Halvorsen OJ, Oyan AM, Bo TH, Stordrange L, et al. ERG upregulation and related ETS transcription factors in prostate cancer. Int J Oncol 2007;30:19-32.	No data regarding endpoints of interest
Scheble VJ, Braun M, Beroukhim R, Mermel CH, Ruiz C, Wilbertz T, et al. ERG rearrangement is specific to prostate cancer and does not occur in any other common tumor. Mod Pathol 2010;23:1061-7.	No data regarding endpoints of interest
Schulz WA, Ingenwerth M, Djuidje CE, Hader C, Rahnenfuhrer J, Engers R. Changes in cortical cytoskeletal and extracellular matrix gene expression in prostate cancer are related to oncogenic ERG deregulation. BMC Cancer 2010;10:505.	No data regarding endpoints of interest by TMPRSS2:ERG status
Setlur SR, Mertz KD, Hoshida Y, Demichelis F, Lupien M, Perner S, et al. Estrogen-dependent signaling in a molecularly distinct subclass of aggressive prostate cancer. J Natl Cancer Inst 2008;100:815-25.	No data regarding endpoints of interest by TMPRSS2:ERG status
Shan L, Ambroisine L, Clark J, Yanez-Munoz RJ, Fisher G, Kudahetti SC, et al. The identification of chromosomal translocation, t(4;6)(q22;q15), in prostate cancer. Prostate Cancer Prostatic Dis 2010;13:117-25.	No data regarding endpoints of interest by TMPRSS2:ERG status
Stott SL, Lee RJ, Nagrath S, Yu M, Miyamoto DT, Ulkus L, et al. Isolation and characterization of circulating tumor cells from patients with localized and metastatic prostate cancer. Sci Transl Med 2010;2:25ra3.	Examining Specialized Subgroups (circulating tumor cells)
Tomlins SA, Aubin SM, Siddiqui J, Lonigro RJ, Sefton-Miller L, Miick S, et al. Urine TMPRSS2:ERG fusion transcript stratifies prostate cancer risk in men with elevated serum PSA. Sci Transl Med 2011;3:94ra72.	Continuous Assay
Tomlins SA, Rhodes DR, Yu J, Varambally S, Mehra R, Perner S, et al. The role of SPINK1 in ETS rearrangement-negative prostate cancers. Cancer Cell 2008;13:519-28.	No data regarding endpoints of interest by TMPRSS2:ERG status
Toubaji A, Albadine R, Meeker AK, Isaacs WB, Lotan T, Haffner MC, et al. Increased gene copy number of ERG on chromosome 21 but not TMPRSS2-ERG fusion predicts outcome in prostatic adenocarcinomas. Mod Pathol 2011;24:1511-20.	Case-control studies were excluded because cumulative incidence ratios could not be calculated for the recurrence/mortality analyses
Vinarskaja A, Schulz WA, Ingenwerth M, Hader C, Arsov C. Association of PITX2 mRNA down-regulation in prostate cancer with promoter hypermethylation and poor prognosis. Urol Oncol 2011.	No data regarding endpoints of interest by TMPRSS2:ERG status
Wernert N, Wullich B, Unteregger G. German Prostate Carcinoma Consortium (DPKK) reg. co.: 7th Interdisciplinary Workshop Bonn/Konigswinter. Urologe - Ausgabe A 2010;49:415-20.	Unavailable in English
Xiang H, Ling ZX, Sun K, Ren GP, You QH, Zhu XZ. Detection and significance of fusion gene between TMPRSS2 and ETS transcription factor genes in fresh prostatic cancer tissues in Chinese patients. Chinese Journal of Pathology 2011;40:187-8.	Unavailable in English
Xiao L, Zhu XZ, Wang Y, Gong Y, Guo CC. TMPRSS2-ERG gene fusion in metastatic prostate cancers: A study of fine needle aspiration specimens. Chinese Journal of Pathology 2011;40:392-6.	Unavailable in English
Yaskiv O, Zhang X, Simmerman K, Daly T, He H, Falzarano S, et al. The utility of ERG/P63 double immunohistochemical staining in the diagnosis of limited cancer in prostate needle biopsies. Am J Surg Pathol 2011;35:1062-8.	Data for Gleason score by TMPRSS2:ERG status unavailable in the categorization specified for the meta-analysis
Yin L, Rao P, Elson P, Wang J, Ittmann M, Heston WD. Role of TMPRSS2-ERG gene fusion in negative regulation of PSMA expression. PLoS One 2011;6:e21319.	No data regarding TMPRSS2:ERG or endpoints of interest
Zhang S, Pavlovitz B, Tull J, Wang Y, Deng FM, Fuller C. Detection of TMPRSS2 gene deletions and translocations in carcinoma, intraepithelial neoplasia, and normal epithelium of the prostate by direct fluorescence in situ hybridization. Diagn Mol Pathol 2010;19:151-6.	No Events
